# Supplementary material
Source: PubMed Central journal article supplement (PMC7780486)
Supplement: NIHMS1657761-supplement-Supporting_Info.pdf [file NIHMS1657761-supplement-Supporting_Info.pdf]

## Supporting Information

### A PHOTOISOMERIZING RHODOPSIN MIMIC OBSERVED AT ATOMIC RESOLUTION

Meisam Nosrati, Tetyana Berbasova, Chrysoula Vasileiou, Babak Borhan,\*  
and James H. Geiger\*

Michigan State University, Department of Chemistry, East Lansing, MI 48824

Email: [babak@chemistry.msu.edu](mailto:babak@chemistry.msu.edu)  
[geiger@chemistry.msu.edu](mailto:geiger@chemistry.msu.edu)

|                                                                                      |     |
|--------------------------------------------------------------------------------------|-----|
| A. Materials and Methods.....                                                        | S2  |
| B. Site-directed Mutagenesis .....                                                   | S2  |
| C. Protein Expression and Purification of CRABP <sub>II</sub> /pET-17b Mutants ..... | S4  |
| D. Summary of mutants.....                                                           | S5  |
| E. Extinction Coefficient Determination .....                                        | S5  |
| F. UV-Vis measurements .....                                                         | S6  |
| G. pK <sub>a</sub> determination of hCRABP <sub>II</sub> mutants .....               | S6  |
| H. Light irradiations and titrations.....                                            | S15 |
| I. Protein Crystallization.....                                                      | S19 |
| J. Data Collection and refinement .....                                              | S22 |
| K. Overlay structures of <b>M2</b> mutant from the first three cycles.....           | S26 |
| L. References .....                                                                  | S26 |

## A. MATERIALS AND METHODS

UV-vis spectra were recorded using a Cary 300 Bio WinUV, Varian spectrophotometer. All-*trans*-retinal was purchased from TRC and was used as received. All the other chemicals were purchased from Sigma-Aldrich unless otherwise specified. Fast Q anion exchange resin was purchased from GE Health Care. A BioLogic DuoFlow (BioRad) chromatography instrument was used for protein purifications. Source 15Q resin was purchased from GE Health Care. Sonication of bacterial cells was performed using an Ultrasonic Homogenizer from Biologics, Inc.

## B. SITE-DIRECTED MUTAGENESIS

The CRABP<sub>II</sub>-pET17b plasmid described <sup>1</sup> was used for mutagenesis following the QuickChange Site-directed Mutagenesis Kit protocol (Agilent Technologies). PCR conditions for amplification of mutants are specified below:

| Total Reaction Volume      | 50 $\mu$ L            |
|----------------------------|-----------------------|
| Template ( DNA plasmid )   | 70ng ( x $\mu$ L )    |
| Primer Forward             | 20 pmol ( y $\mu$ L ) |
| Primer Reverse             | 20 pmol ( z $\mu$ L ) |
| dNTP                       | 1 $\mu$ L             |
| 10x pfu Buffer             | 5 $\mu$ L             |
| Pfu Turbo (DNA Polymerase) | 1 $\mu$ L             |
| DI water                   | 50-x-y-z-7 $\mu$ L    |

| PCR Program |                                                          |              |
|-------------|----------------------------------------------------------|--------------|
| 1x          | 95 °C                                                    | 30 min       |
|             | 95 °C                                                    | 30 sec       |
| 20x         | Temperature 3-5 °C lower than primer melting temperature | 1 min        |
|             | 72 °C                                                    | 4 min 30 sec |
| 1x          | 72 °C                                                    | 10 min       |
| 1x          | 25 °C                                                    | 10 min       |

## List of Primers

### F3Q

Forward: 5'- CCAAAC**CAAT**CTGGCAACTGGAAA-3'

Reverse: 5'-TTTCCAGTTGCCAGAT**TTG**TTTGG-3'

### A32Y

Forward: 5'-GAGGAAGATTT**TAT**GTGGCTGC-3'

Reverse: 5'-GCAGCCAC**ATAA**TCTTCCTC-3'

**A32W**

Forward: 5'-GTGATGCTGAGGAAGATTTGGGTGGCTGC-3'

Reverse: 5'-GCAGCCACCCAAATCTTCCTCAGCATCAC-3'

**P39Y**

For: 5' GCAGCGTCCAAGTATGCAGTGG 3'

Rev: 5' CCACTGCATACTTGGACGCTGC 3'

**P39Q**

For: 5' GCAGCGTCCAAGCAAGCAGTGG 3'

Rev: 5' CCACTGCTTGCTTGGACGCTGC 3'

**T54V**

Forward: 5'-CTACATCAAAGTCTCCACCACCGTGCG -3'

Reverse: 5'- CGCACGGTGGTGGAGACTTTGATGTAG -3'

**R59Y**

Forward: 5'- CCTCCACCACCGTGTACACCACAGAG -3'

Reverse: 5'- CTCTGTGGTGTACACGGTGGTGGAGG -3'

**R59W**

Forward: 5'- CCTCCACCACCGTGTGGACCACAGAG -3'

Reverse: 5'- CTCTGTGGTCCACACGGTGGTGGAGG -3'

**R111K**

Forward: 5'-CCCAAGACCTCGTGGACCAAAAGAACTGACCAACGATGGG-3'

Reverse: 5'-CCCATCGTTGGTCAGTTC~~TTT~~GGTCCACGAGGTCTTGGG-3**R132Q: Y134F**

Forward: 5'- GTTGTGTGCACCCAGGTCTTCGTCCG-3'

Reverse: 5'-CGGACGAAGACCTGGGTGCACACAAC-3'

**R132Y:Y134F**

Forward: 5' GTTGTGTGCACCTATGTCTTCGTCCGAGAG 3'

Reverse: 5' CTCTCGGACGAAGACATAGGTGCACACAAC 3'

The PCR product (5  $\mu$ L) was transformed into DH5 $\alpha$  cells (50  $\mu$ L) and grown on Luria-Bertani (LB)-agar plates supplemented with Ampicillin (75  $\mu$ g/mL) for 15 h. A single colony was inoculated in 15 mL LB medium containing 100  $\mu$ g/mL ampicillin and grown at 37  $^{\circ}$ C while shaking, for 12 h. DNA purification was performed using a QIAGEN Miniprep DNA purification kit. The average isolated plasmid DNA concentration was 120 ng/ $\mu$ L in 60  $\mu$ L solution. The DNA sequence was verified by the MSU gene sequencing facility using a primer on the T7 promoter.

### C. PROTEIN EXPRESSION AND PURIFICATION OF CRABPII/PET-17B MUTANTS

The target gene was transformed into *E. coli* BL21(DE3)pLysS competent cells (100 ng of DNA, for 100  $\mu$ L of cell solution) following standard protocols and the cells were grown on Luria-Bertani (LB)-agar plates supplemented with antibiotics (Chloramphenicol: 27  $\mu$ g/mL; Ampicillin: 100  $\mu$ g/mL) at 37 °C for 12 h. A single colony was used to inoculate 50 mL of LB medium containing 27  $\mu$ g/mL chloramphenicol and 100  $\mu$ g/mL ampicillin and was grown at 37 °C, while shaking overnight. The resulting culture was used to inoculate 1 L of LB containing 27  $\mu$ g/mL chloramphenicol and 100  $\mu$ g/mL ampicillin and was grown at 37 °C while shaking till OD<sub>600</sub> reached 0.7-0.9. The expression was induced with addition of isopropyl- $\beta$ -D-thiogalactopyranoside (IPTG, Gold Biotechnology, 1 mM) and the culture was shaken at 19 °C for 36 h. The cells were harvested by centrifugation (5000 rpm, 20 min, 4 °C) and resuspended in Tris-binding buffer (10 mM Tris, pH=8.0, 50 mL). The cells were lysed by sonication (VWR Scientific, power 70%, 3 x 1 min). The solution was spun down (12000 rpm, 30 min, 4 °C) and the supernatant was loaded on a FastQ anion exchange column pre equilibrated with Tris-binding buffer. The column was washed twice with Tris-binding buffer (2 x 100 mL) and the protein was eluted with Tris-elution buffer (10 mM Tris, 150 mM sodium chloride, pH = 8.0, 70 mL). The eluent underwent buffer exchange with Tris-binding buffer using an ultrafiltration cell under nitrogen pressure (~20 psi) (Millipore™, regenerated cellulose membrane YM10, NMWL: 10,000). The desired protein was further purified using a BioLogic DuoFlow system (BioRad) equipped with a 15Q anion exchange column (20 mL total column volume), according to the following protocol:

| Description     |                      | Parameters            |
|-----------------|----------------------|-----------------------|
| Isocratic flow  | pH=8.1, 0% 2M NaCl   | 10.00 mL, 3.00 mL/min |
| Linear Gradient | pH=8.1, 0-4% 2M NaCl | 20.00 mL, 3.00 mL/min |
| Isocratic flow  | pH=8.1, 4% 2M NaCl   | 20.00 mL, 3.00 mL/min |
| Linear Gradient | pH=8.1, 4-8% 2M NaCl | 10.00 mL, 3.00 mL/min |
| Isocratic flow  | pH=8.1, 8% 2M NaCl   | 20.00 mL, 3.00 /min   |

The above protocol was optimized for CRABPII mutants. The buffer used for the above protocol is 50 mM Tris, pH is adjusted automatically. The proteins elute with 4% 2M NaCl.

## D. SUMMARY OF MUTANTS

Table S1. Screening for hCRABPII mutants with fast kinetic PSB formation and slow PSB loss.

| Mutant*                             | Low p <i>K<sub>a</sub></i><br>( $\lambda_{\max}$ nm) | High p <i>K<sub>a</sub></i><br>( $\lambda_{\max}$ nm) | PSB<br>formation<br>(hours) | PSB loss<br>(hours) |
|-------------------------------------|------------------------------------------------------|-------------------------------------------------------|-----------------------------|---------------------|
| <b>M1</b> -KFVQ:P39Q:R59Y           | 5.4 (530)                                            | 8.4 (556)                                             | 3                           | 24                  |
| <b>M2</b> -KFVQ:P39Y:R59Y           | 3.4 (564)                                            | 8.15 (573)                                            | 0.2                         | 10                  |
| <b>M3</b> -KFVQ:P39Q:R59Y:A32W:F3Q  | 9.4 (557)                                            | -                                                     | 5                           | 50 % after 24h      |
| <b>M4</b> -KFVQ: P39Q: R59W         | 5.1 (537)                                            | 7.8 (555)                                             | 3.5                         | 24                  |
| <b>M5</b> -KFVQ:P39Q: R59Y:A32Y     | 5.6 (554)                                            | 8.4 (575)                                             | 4                           | 24                  |
| <b>M6</b> -KFVQ:P39Q:R59Y:A32W      | 6.0 (563)                                            | 8.3 (584)                                             | 2                           | 24                  |
| <b>M7</b> -KFVQ:P39Q:R59W:A32W      | 6.2 (582)                                            | 8.6 (598)                                             | 2                           | 24                  |
| <b>M8</b> -KFVQ:P39Y: R59Y:A32Y     | 3.2 (587)                                            | 8.4 (588)                                             | 0.1                         | 16                  |
| <b>M9</b> -KFVQ:P39Y:R59Y:A32W      | 2.5 (600)                                            | 8.3 (596)                                             | 0.2                         | 12                  |
| <b>M10</b> -KFVQ:P39Y:R59W:A32W     | 3.1 (601)                                            | 8.3 (595)                                             | 0.3                         | 10                  |
| <b>M11</b> -KFVQ:P39Q:R59Y:A32Y:F3Q | 9.3 (545)                                            | -                                                     | 3                           | -                   |
| <b>M12</b> -KFVQ:P39Q:R59W:A32W:F3Q | 9.0 (571)                                            | -                                                     | 3                           | -                   |

\* KFVQ is the abbreviation for R111K:Y134F:T54V:R132Q

## E. EXTINCTION COEFFICIENT DETERMINATION

The absorption extinction coefficients ( $\epsilon$ ) for the various CRABPII mutants were determined according to the method described by Gill and von Hippel <sup>2</sup>.

Extinction coefficients of the CRABPII mutants:

| Protein                               | $\epsilon_{280\text{nm}}$ ( $\text{M}^{-1}\text{cm}^{-1}$ ) |
|---------------------------------------|-------------------------------------------------------------|
| <b>M1</b> - KFVQ:P39Q:R59Y            | 20749                                                       |
| <b>M2</b> - KFVQ:P39Y:R59Y            | 22487                                                       |
| <b>M3</b> - KFVQ:P39Q:R59Y:A32W:F3Q   | 29004                                                       |
| <b>M4</b> - KFVQ:P39Q:R59W            | 25582                                                       |
| <b>M5</b> - KFVQ:P39Q:R59Y:A32Y       | 22441                                                       |
| <b>M6</b> - KFVQ:P39Q:R59Y:A32W       | 26681                                                       |
| <b>M7</b> - KFVQ:P39Q:R59W:A32W       | 29659                                                       |
| <b>M8</b> - KFVQ:P39Y:R59Y:A32Y       | 21881                                                       |
| <b>M9</b> - KFVQ:P39Y:R59Y:A32W       | 24768                                                       |
| <b>M10</b> - KFVQ:P39Y:R59W:A32W      | 30878                                                       |
| <b>M11</b> - KFVQ:P39Q:R59Y:A32Y:F3Q  | 21169                                                       |
| <b>M12</b> - KFVQ:P39Q:R:59W:A32W:F3Q | 29697                                                       |

KFVQ is the abbreviation for R132K:Y134F:T54V:R132Q

## F. UV-VIS MEASUREMENTS

The CRABP II-PSB formation ( $\lambda_{\text{max}} > 450 \text{ nm}$ ) was followed by UV-vis in phosphate buffer (4 mM  $\text{NaH}_2\text{PO}_4$ , 16 mM  $\text{Na}_2\text{HPO}_4$ , 150 mM  $\text{NaCl}$ ,  $\text{pH}=7.3$ ). The experiment was performed with a final protein concentration of 50  $\mu\text{M}$  upon addition of 0.5 equivalent of retinal (from a stock solution of 1 mM in ethanol). Absorptions with  $\lambda_{\text{max}} > 450 \text{ nm}$  are due to formation of PSB, while deprotonated imine peaks (SB) appear at  $\sim 360 \text{ nm}$ . Non-covalently bound retinal absorbs at  $\sim 380 \text{ nm}$ .

## G. pK<sub>a</sub> DETERMINATION OF CRABP II MUTANTS

The pK<sub>a</sub> values were determined based on the plot of the absorbance change vs pH by using the curve fitting protocol previously described for bacteriorhodopsin pK<sub>a</sub> determination<sup>3</sup>.

The total PSB absorbance change during each acidification or basification in comparison to the point with minimum PSB absorption ( $\Delta A$ ) is plotted against the pH.

$$\Delta A = \Delta A_0 / ( 1 + 10^{[\text{pH} - \text{pK}_a]} )$$

## Base Titrations In Citrate Buffer

A 50  $\mu\text{M}$  solution of various hCRABPII mutant proteins were incubated with 0.5 equivalent of retinal in 100 mM citrate buffer at pH=5.0. The UV-Visible spectrum was followed until PSB formation maximized. Titration of the PSB to SB was conducted by the addition of 1 M NaOH aliquots.

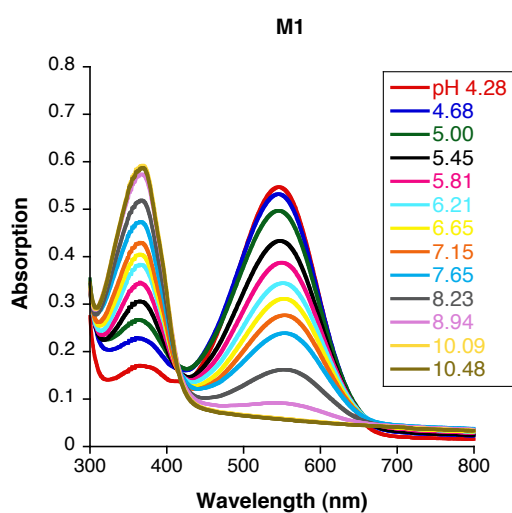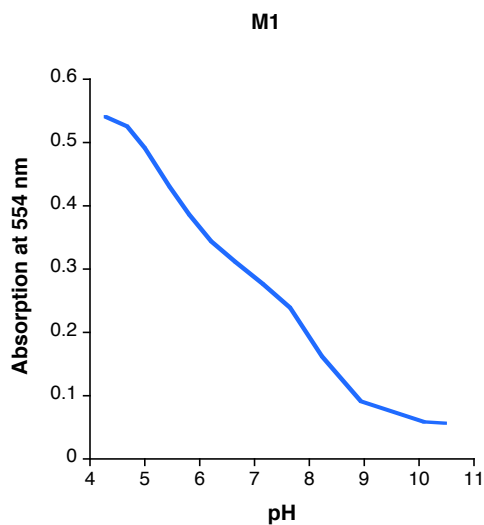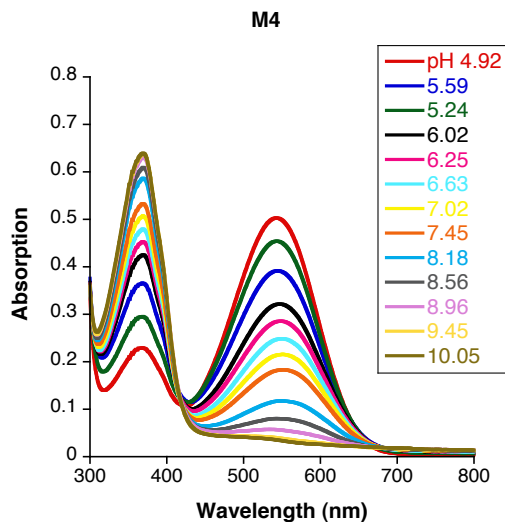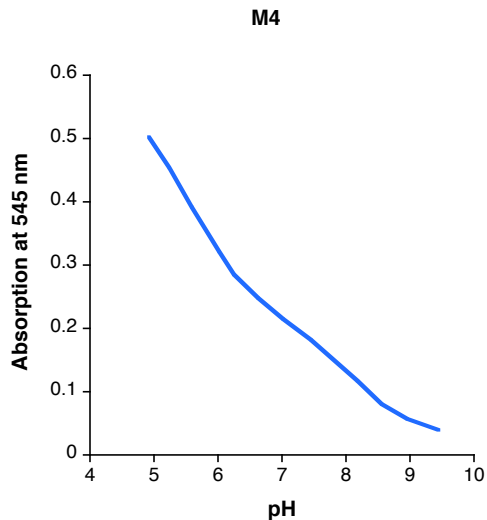

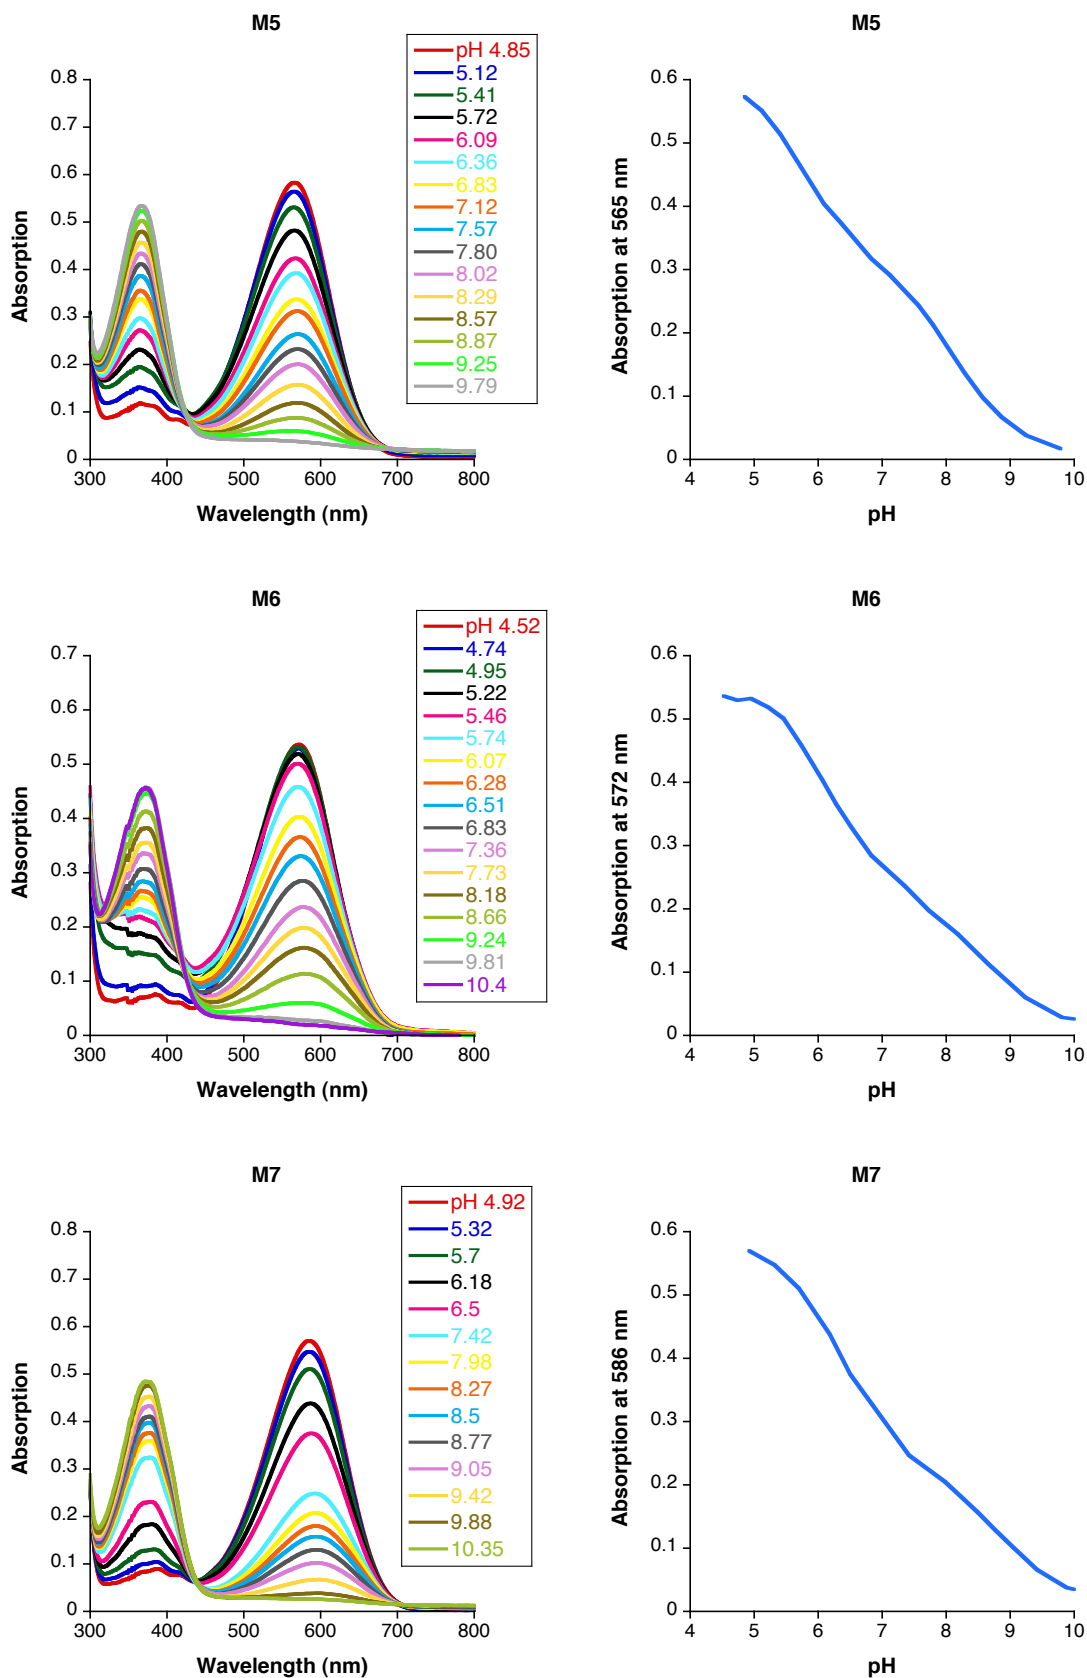

**Figure S1.** Base titrations in citrate buffer. Left panel: UV-visible spectra for each mutant shown; Right Panel: The plot of pH versus absorbance derived from the data shown to the left.



## Acid Titrations

A 50  $\mu\text{M}$  solution of the various hCRABPII mutant proteins were incubated with 0.5 equivalent of retinal in PBS buffer. The UV-Visible spectrum was followed until PSB loss plateaued (12-24 h). A saturated citric acid buffer solution was used to acidify the protein for the first few points. Further acidification with a 6 M HCl solution completed the SB to PSB conversion.

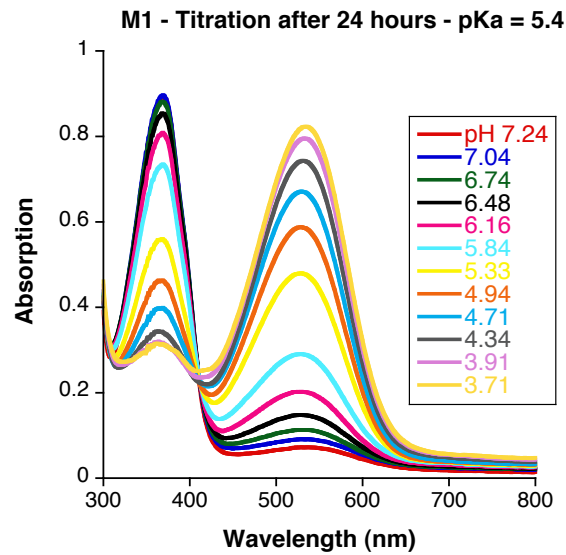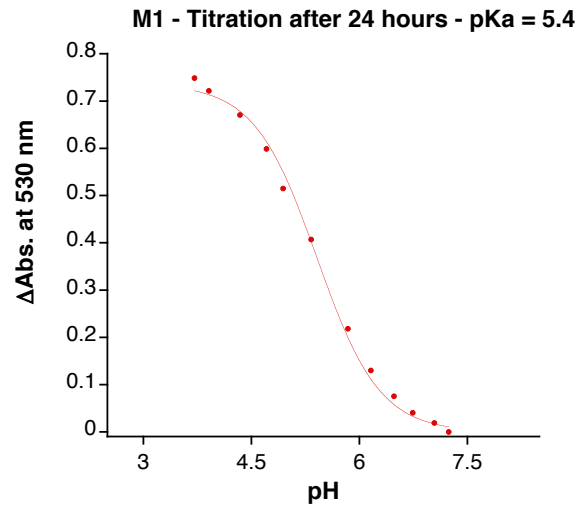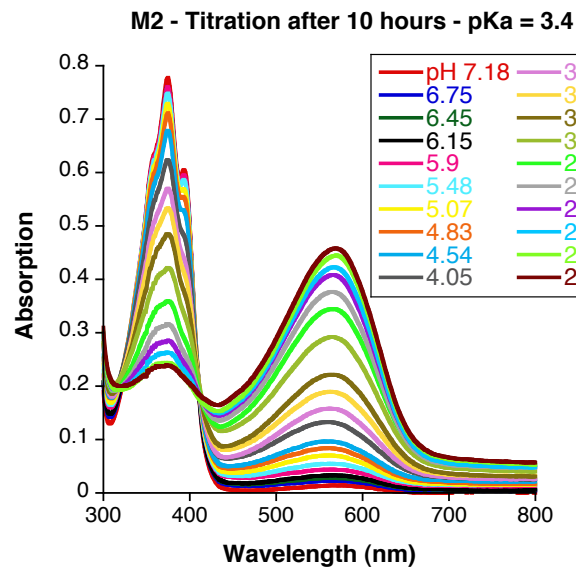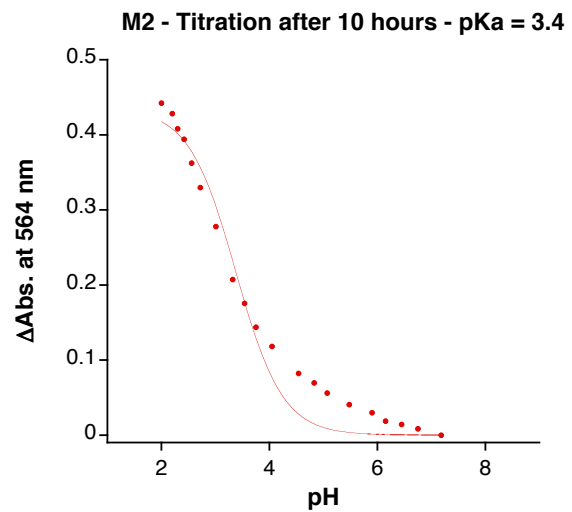

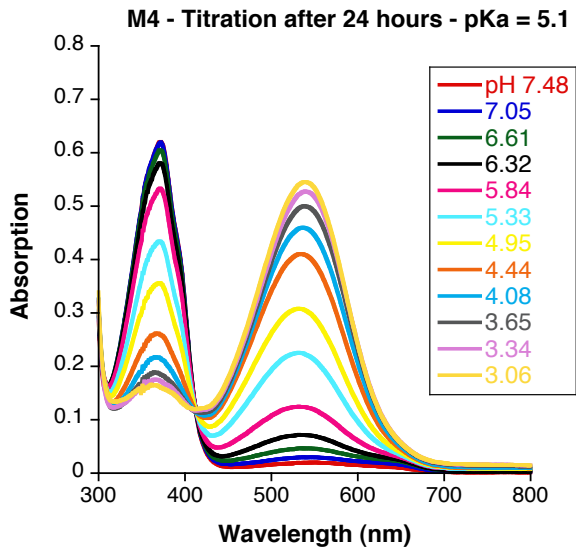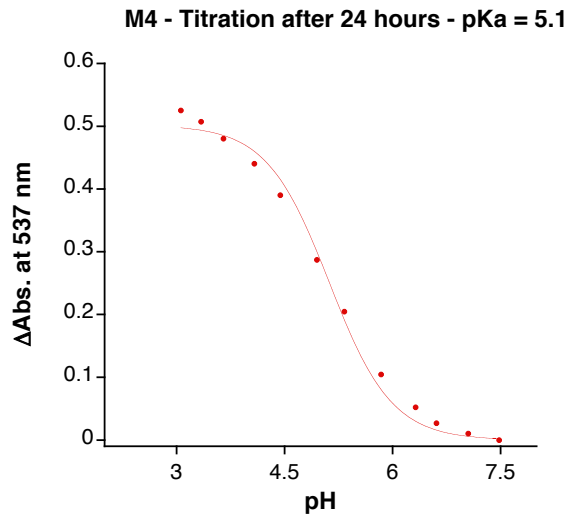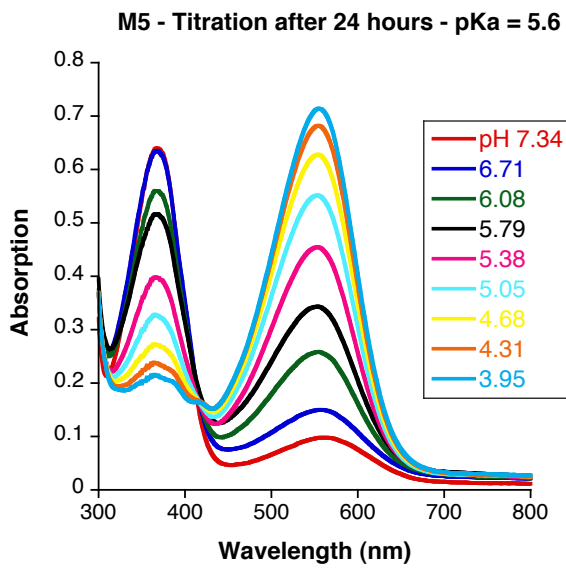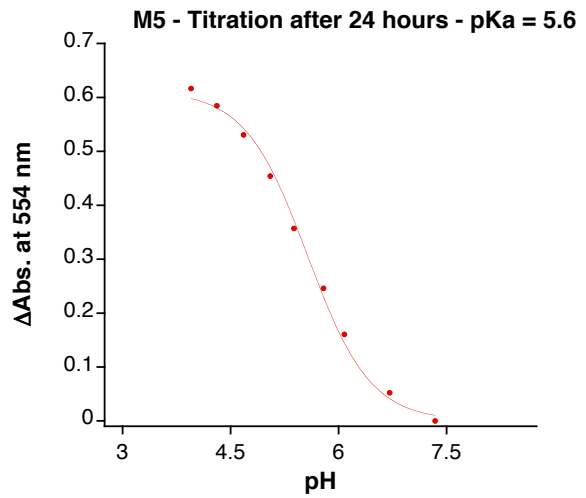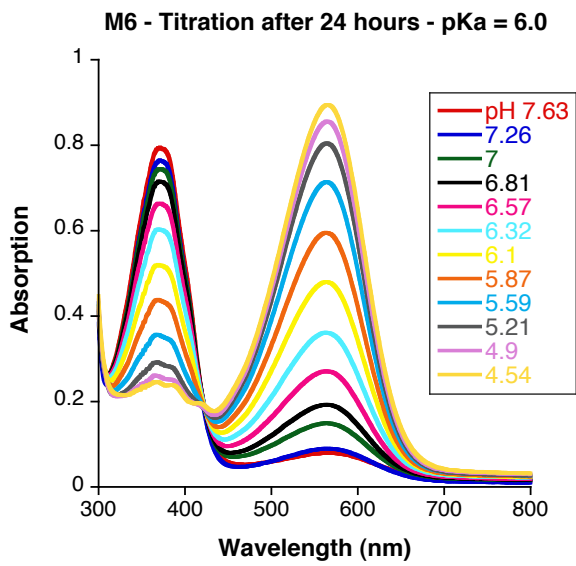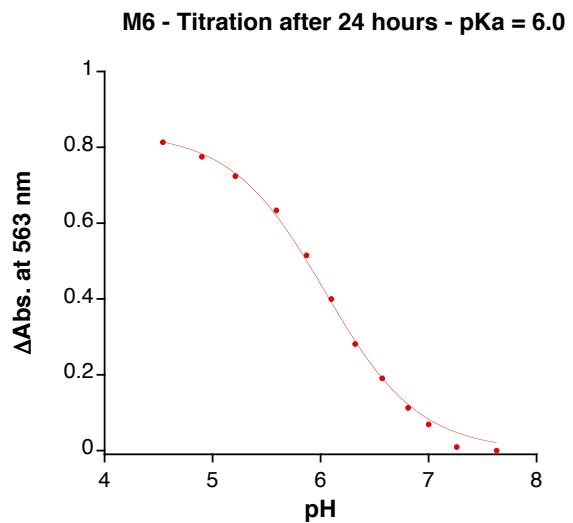

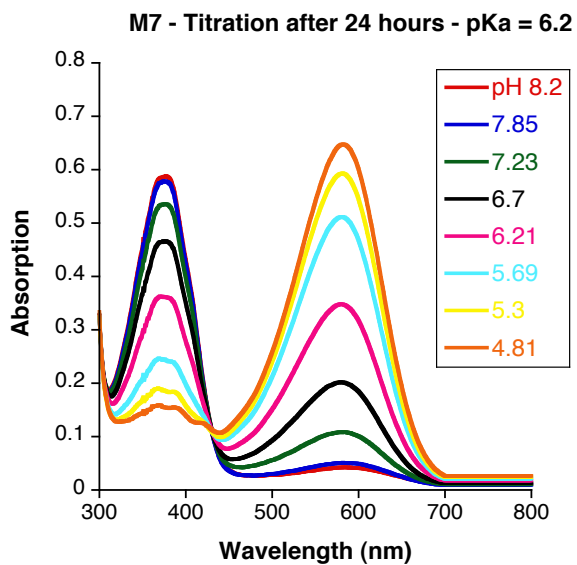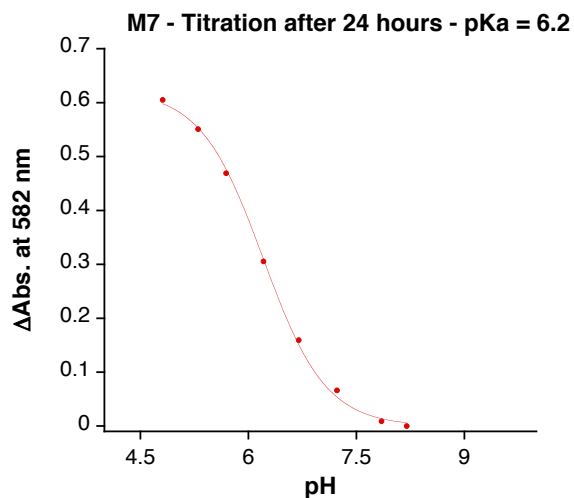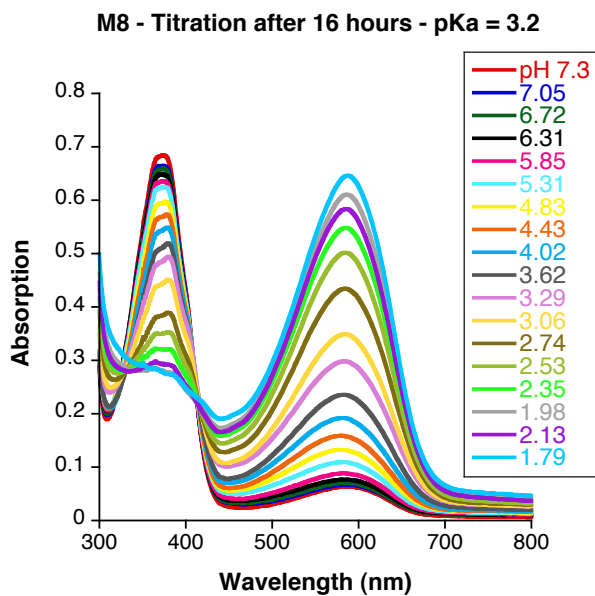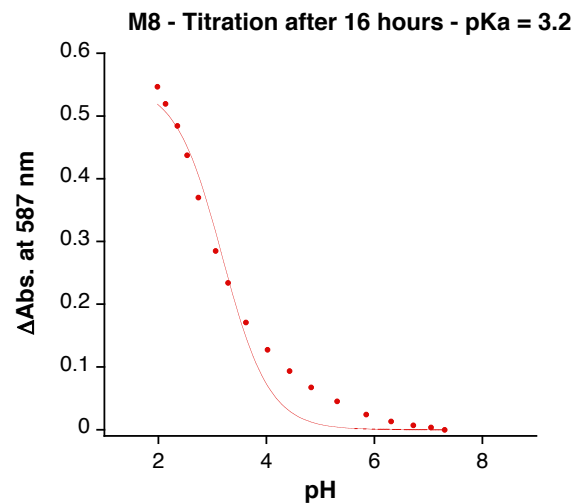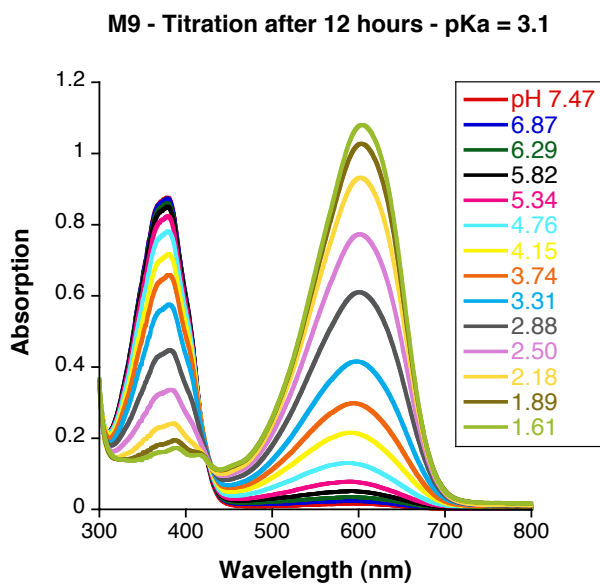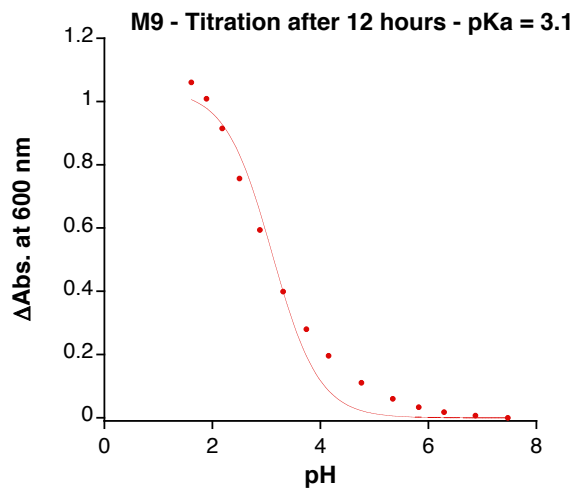

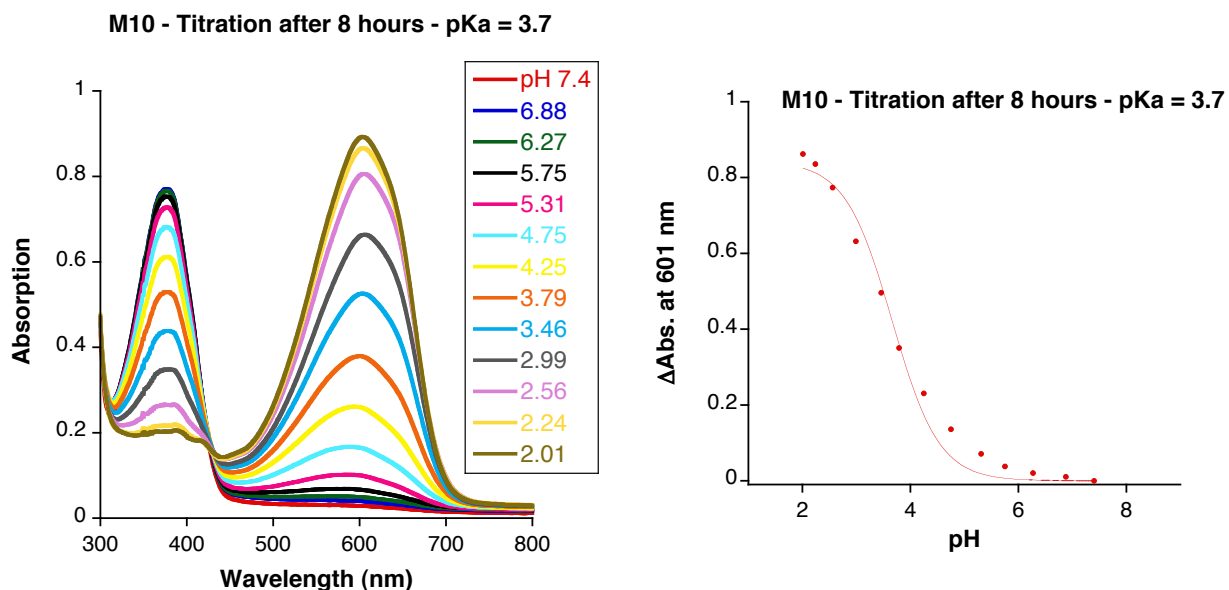

**Figure S2.** Acid titrations after PSB: Left panel: UV-visible graphs. Right panel: The plot of pH versus absorbance difference ( $\Delta$ A).

## Base Titrations In PBS Buffer

A 50  $\mu$ M solution of hCRABPII proteins was incubated with 0.5 equivalent of retinal in PBS buffer. The UV-Visible spectrum was followed until PSB formation was at a maximum. 1 M NaOH solution was used to basify the protein solution until the complete conversion of PSB to SB was achieved.

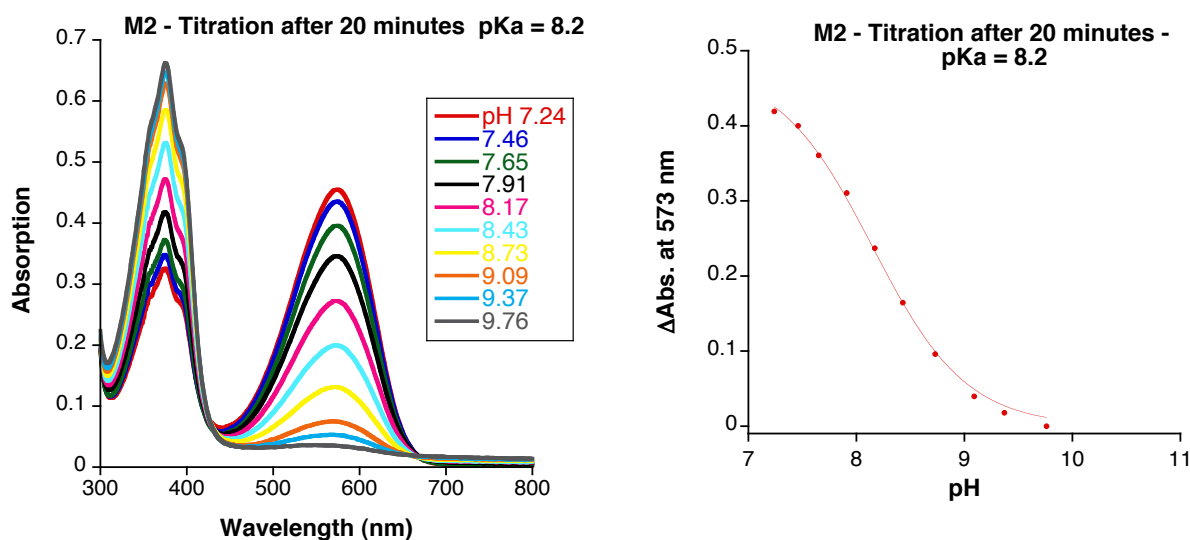

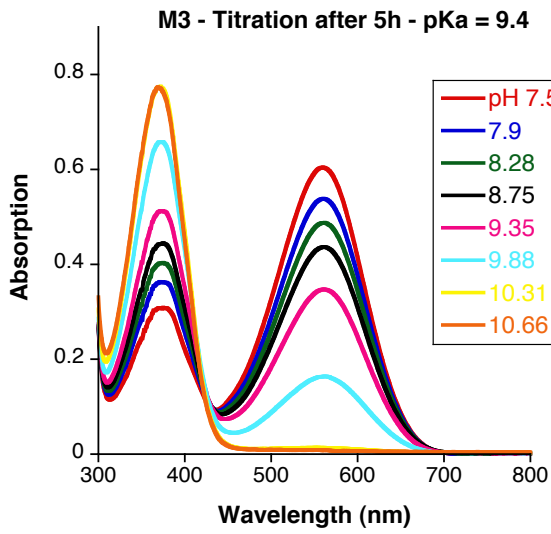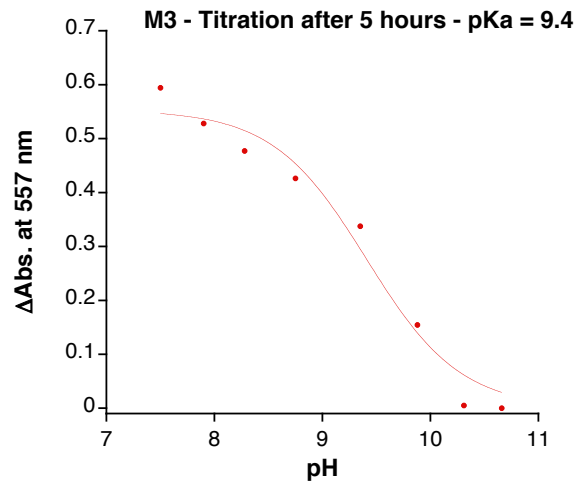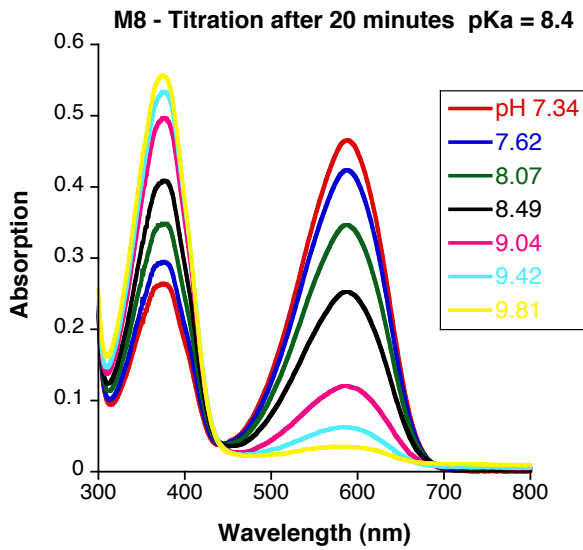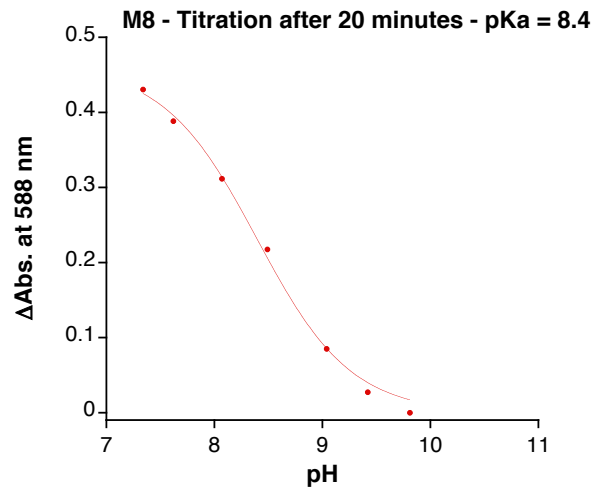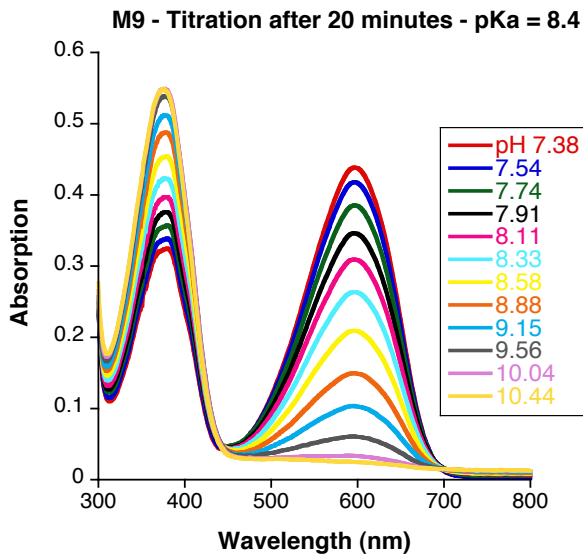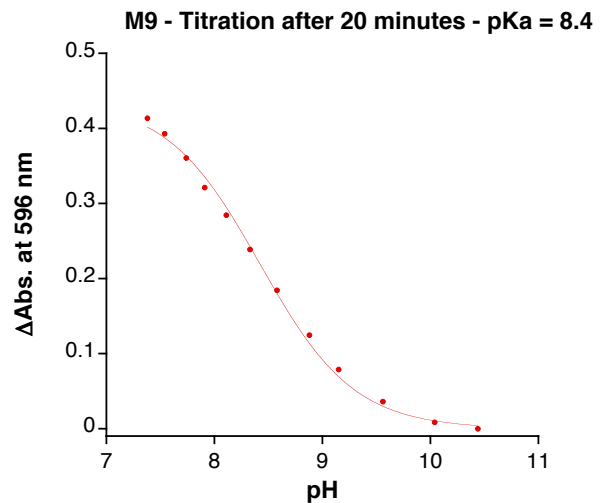

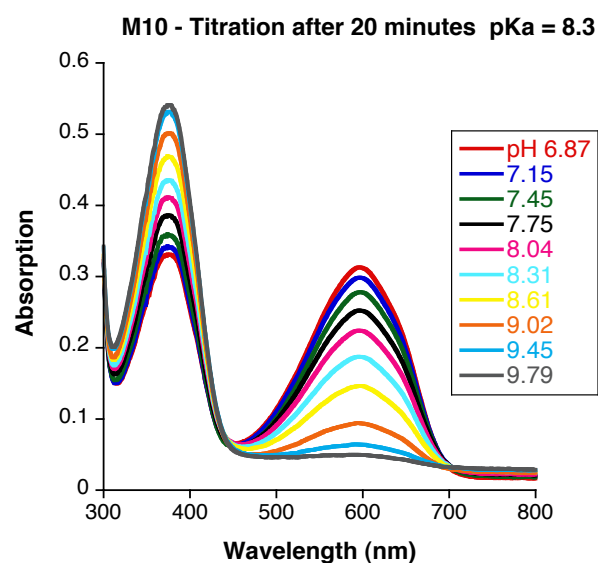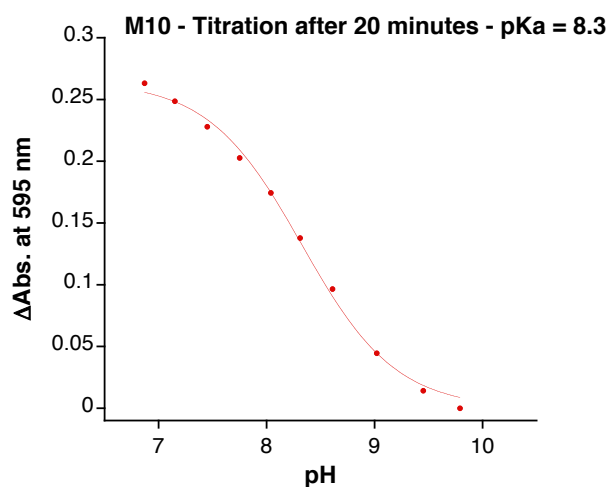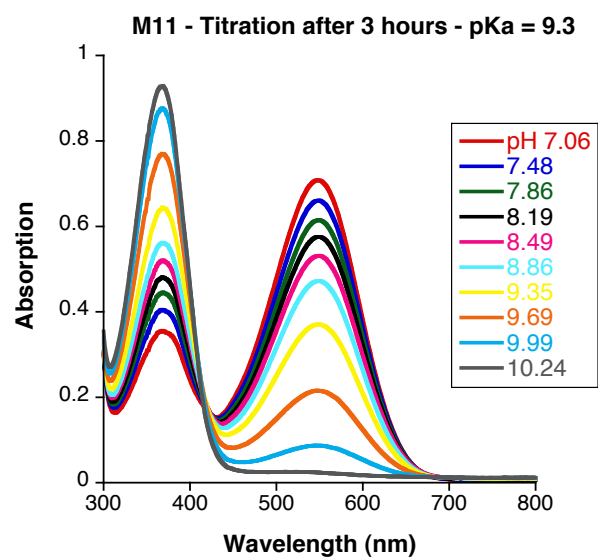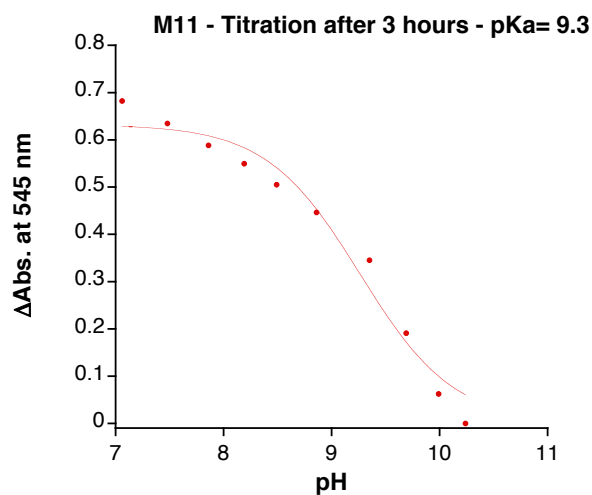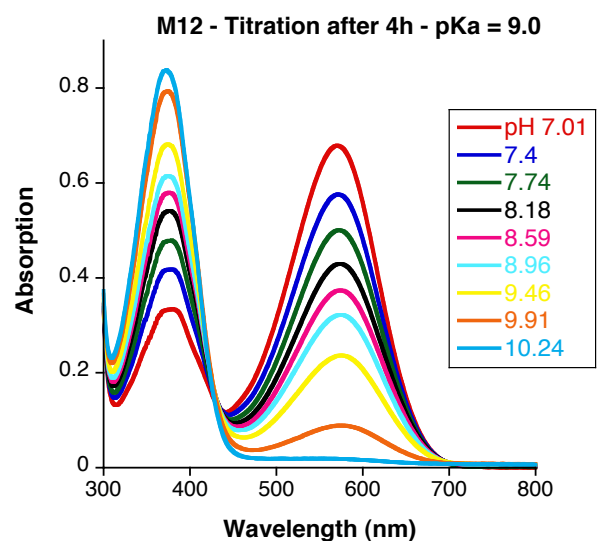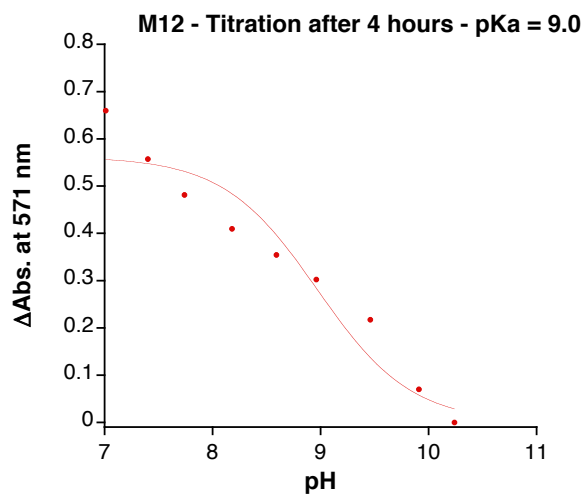

**Figure S3.** Base titrations after maximum PSB formation : Left panel: UV-visible graphs. Right panel: The plot of pH versus absorbance difference ( $\Delta$ A).

## H. Light Irradiations and Titrations

### Light Irradiation Protocols

An Oriel Illuminator (Model 66142, Oriel Instruments) connected to a power supply (Model 668820, Oriel Instruments, 500 W Mercury (Xenon) lamp) was used for all light irradiations. For both UV and visible irradiations, a combination of two filters was used.

**UV irradiations:** Glass filter (6 mm thickness) to filter UV light below  $\sim 320$  nm; U-360 (UV) 2" square band-pass filter (Center Wavelength CWL = 360 nm, Full Width-Half Max FWHM = 45 nm, purchased from Edmund Optics, Figure S1a).

**Visible light yellow irradiations:** Glass filter (6 mm thickness) to filter UV light below  $\sim 320$  nm; Y-50 2" square long-pass filter (cut-off position =  $500 \pm 6$  nm, purchased from Edmund Optics).

### UV Irradiation - Titrations In PBS Buffer

A 50  $\mu\text{M}$  solution of hCRABPII proteins was incubated with 0.5 equivalent of retinal in PBS buffer. The UV-Visible spectrum was followed until PSB formation was at a maximum. UV irradiation (1-2 min) as described above was used to convert the remaining SB to PSB. A 1 M NaOH solution was used to basify the protein solution to achieve complete conversion of the PSB to SB.

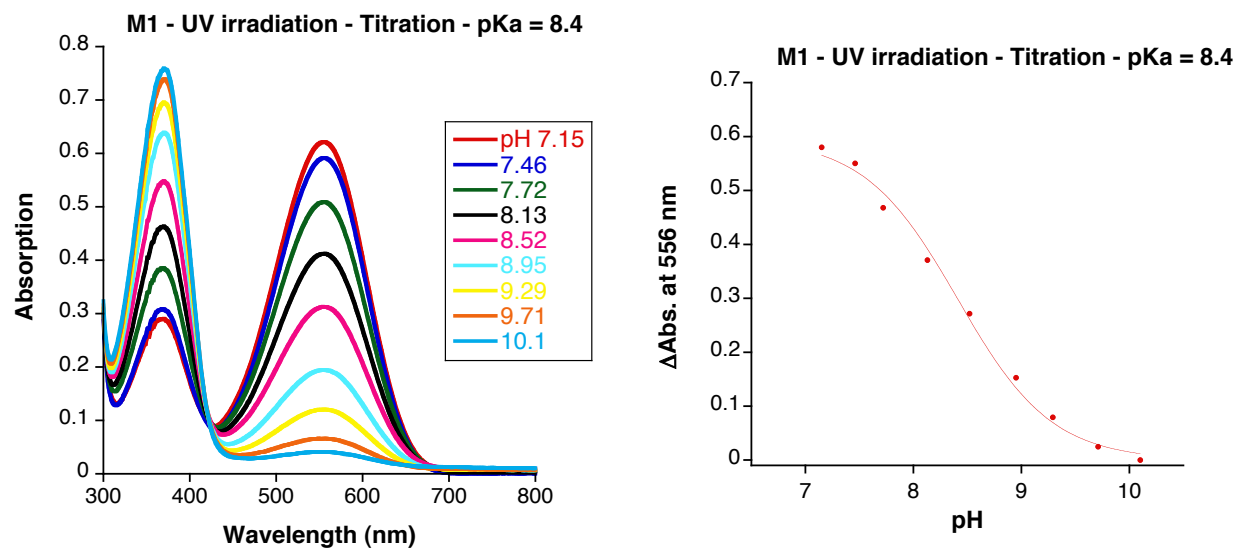

M2 - UV irradiation - Titration - pKa = 7.7

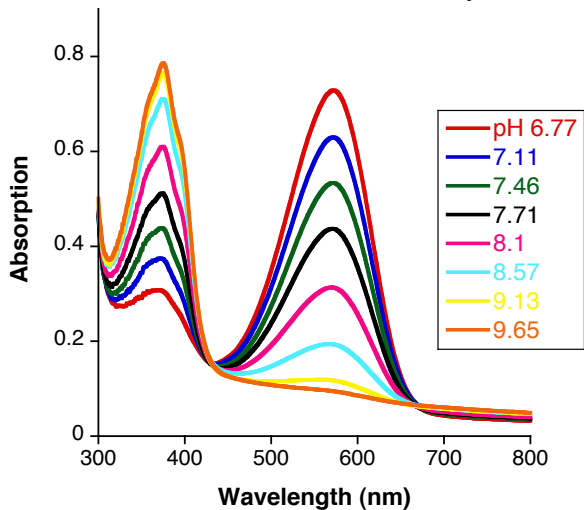

M2 - UV irradiation - Titration - pKa = 7.7

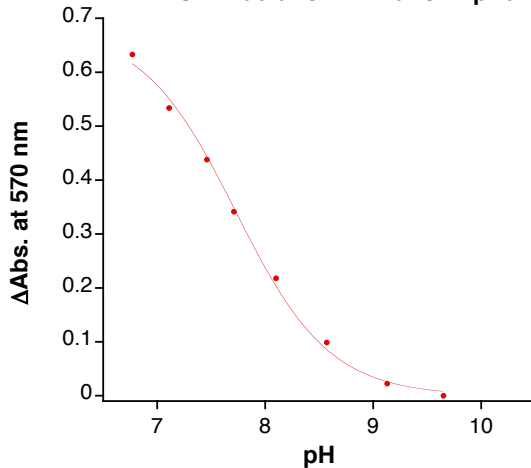

M4 - UV irradiation - Titration - pKa = 7.8

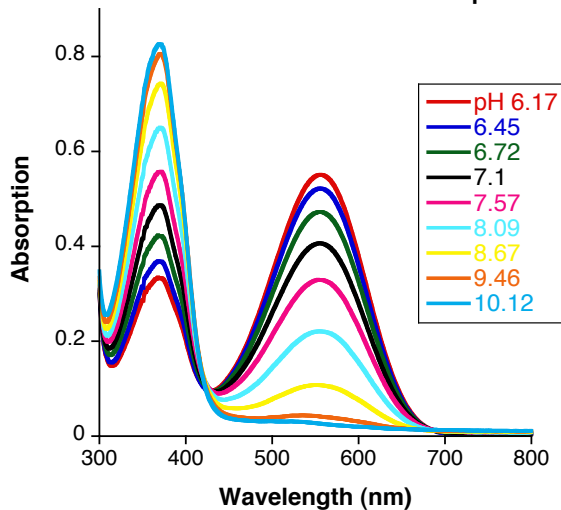

M4 - UV irradiation - Titration - pKa = 7.8

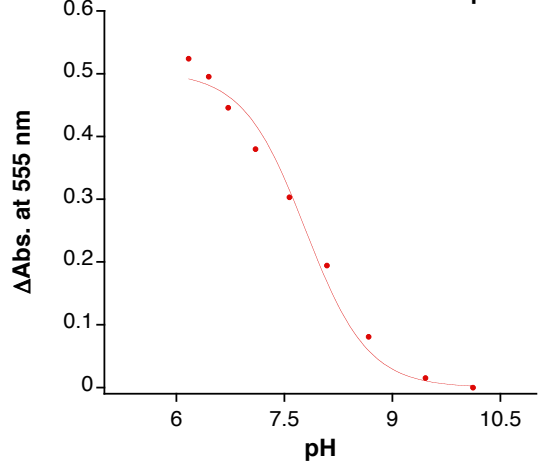

M5 - UV irradiation - Titration - pKa = 8.4

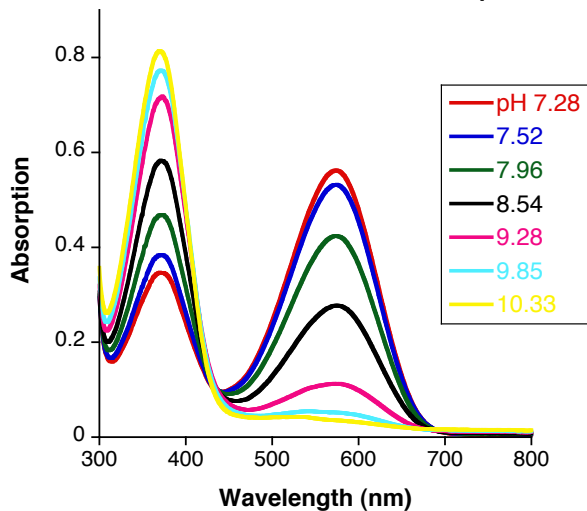

M5 - UV irradiation - Titration - pKa = 8.4

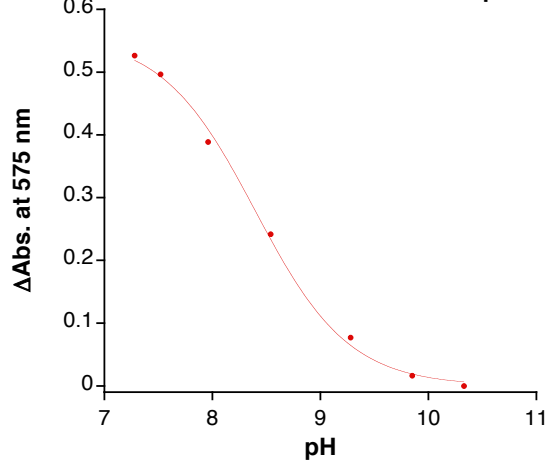



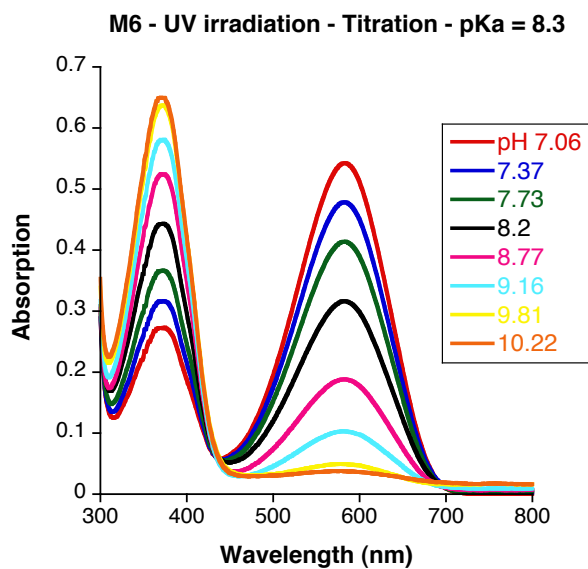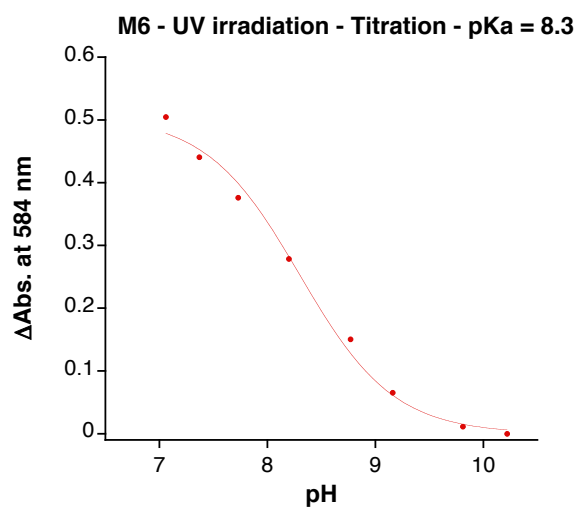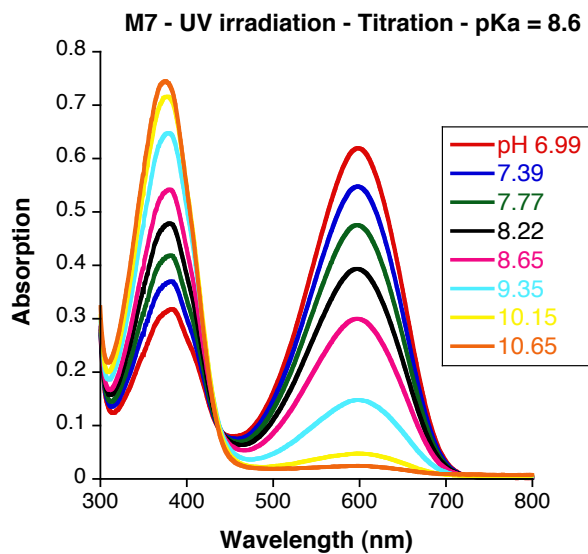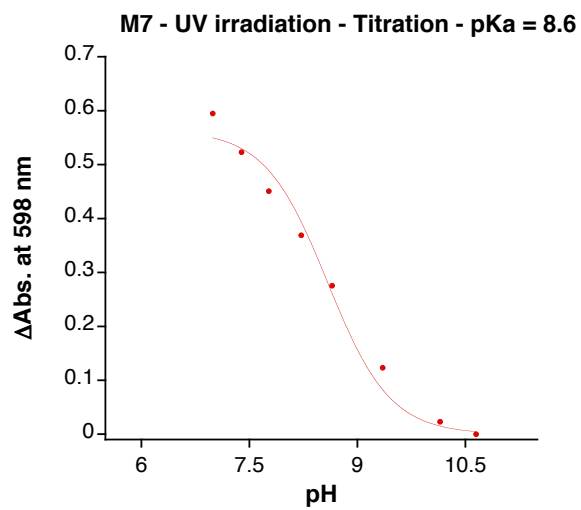

**Figure S4.** Base titrations after UV irradiation. Left panel: UV-visible spectra. Right panel: The plot of pH versus absorbance difference.

## Cycling Of The M2 And M3 Mutants In Solution

A 50  $\mu\text{M}$  solution of protein was incubated with 0.5 equivalent of retinal in PBS buffer for 20 min. Following the protocol described above, visible yellow light irradiation for 1 min was performed followed by 3 min UV irradiation. After each step UV-Vis spectra were collected. The process was repeated for 5 cycles.

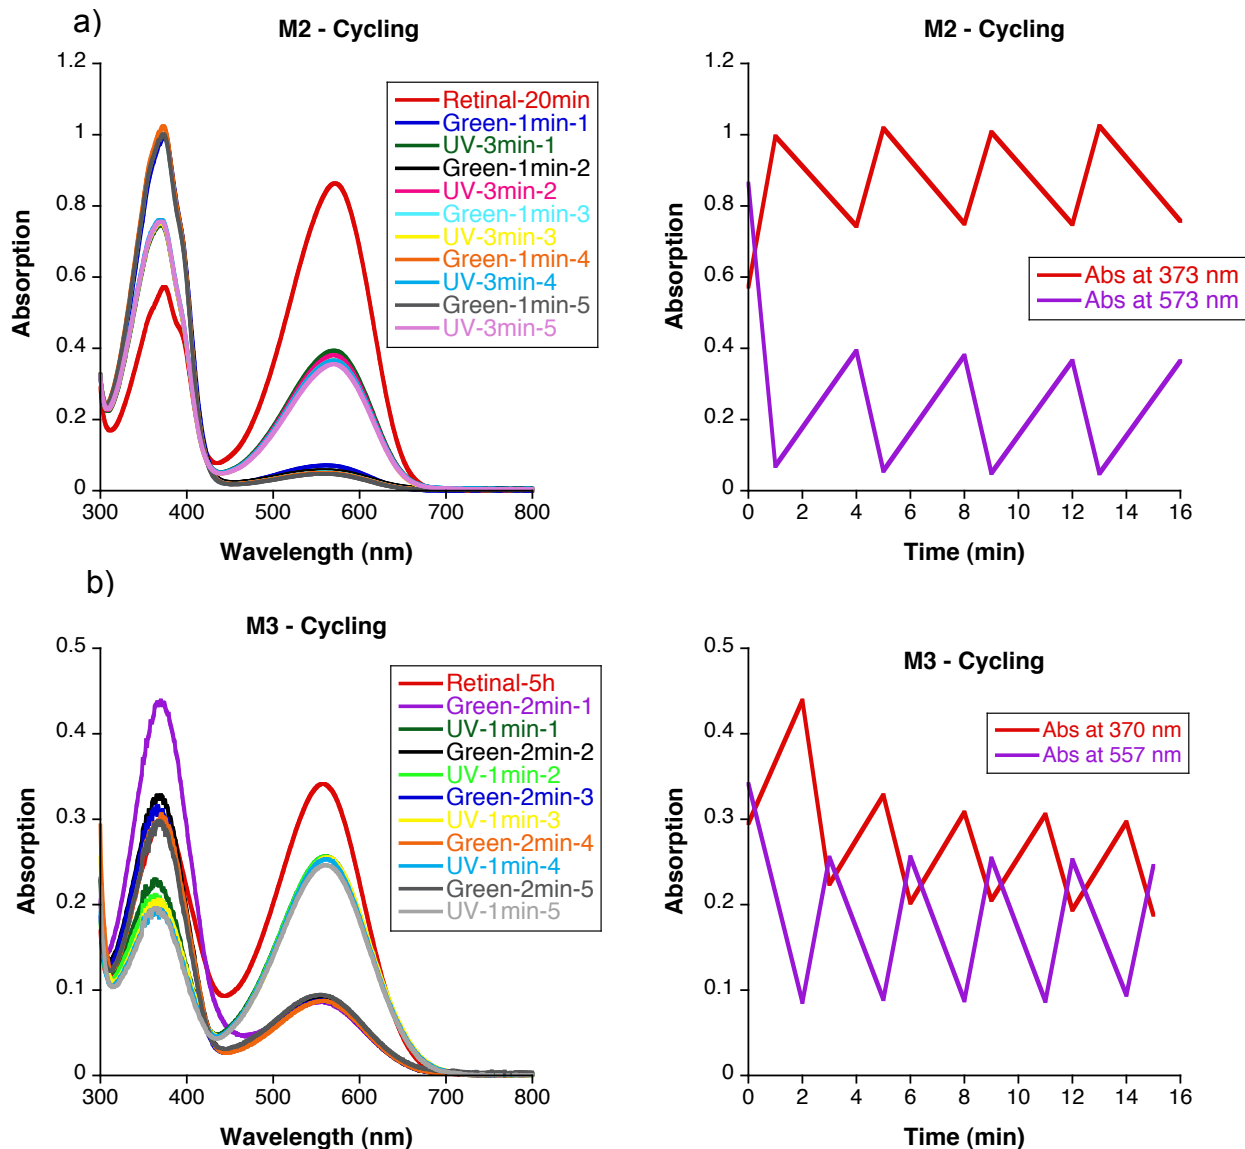

**Figure S5.** Cycling of the hCRABPII proteins in solution with UV and yellow light for mutant M2 (a) and M3 (b).

## PSB Recovery after Green Light Irradiation

A 50  $\mu\text{M}$  solution of each hCRABPII mutant was incubated with 0.5 equivalent of retinal in PBS buffer until maximum PSB formation was achieved. The protein solution was irradiated with visible yellow light until the PSB absorption was at its minimum. The recovery of the PSB was then monitored by UV-vis spectroscopy.

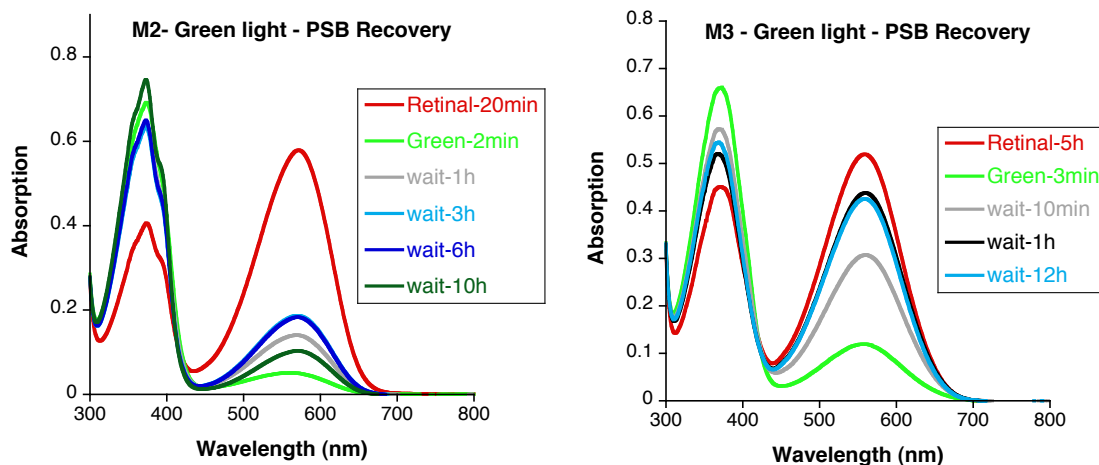

**Figure S6.** Mutants M2 and M3 are irradiated with visible light until maximum PSB loss. PSB recovery was then monitored. In 1 h mutant M3 has significant PSB recovery, while M2 much less.

## I. PROTEIN CRYSTALLIZATION

### M2 Mutant

#### High $pK_a$ form

To the concentrated protein solution at 20 mg/mL was added four equivalents of retinal and incubated for 20 minutes. A 24 well crystallization plate was used for vapor diffusion crystallization with the reservoir solution of 1 mL, containing 12% PEG3350 and 0.1 M malonate at pH = 6.0. 1  $\mu\text{L}$  of protein solution was mixed with 1  $\mu\text{L}$  reservoir solution. Crystals appeared and grew after 24 h at 4  $^{\circ}\text{C}$ . Crystals were flash frozen in a solution containing the mother liquor and 20% glycerol.

#### Low $pK_a$ form

To a protein solution at 1.1 mg/mL was added four equivalents of retinal. The spectra of the protein-ligand mixture were tracked until complete loss of PSB was obtained. The mixture was concentrated to 20 mg/mL using concentrator cells. A twenty-four well crystallization plate was used for vapor diffusion crystallization with the reservoir solution containing 12% PEG 3350 and 0.1 M malonate at pH = 6.0. 1  $\mu\text{L}$  of protein

solution was mixed with 1  $\mu\text{L}$  reservoir solution. Crystals appeared and grew after 24 h. These crystals had a light blue color indicating the presence of PSB in the crystals. In order to deprotonate the PSB in the crystals, they were soaked in 12% PEG 3350 and 0.1 M malonate at  $\text{pH} = 7.5$  for 30 minutes until crystals became colorless. The soaked crystals were flash frozen in the same solution containing 20% glycerol.

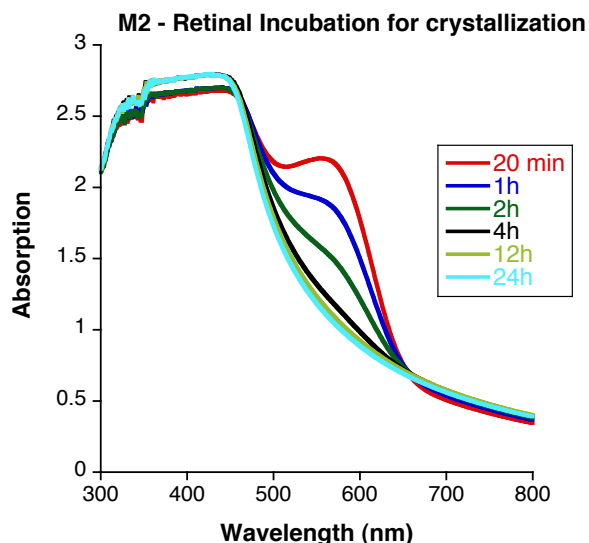

**Figure S7.** M2 mutant PSB loss overtime in the solution used for crystallization.

### For UV Irradiated PSB Product

Soaked crystals described in the previous section were UV irradiated with a hand held TLC UV lamp for 30 minutes in the dark. The UV irradiated crystals showed a dark blue color at the end of the irradiation period. These crystals were transferred to a solution of 12% PEG 3350, 0.1M malonate at  $\text{pH} = 7.5$  and 20% glycerol and flash frozen immediately under dim microscope light, while still being irradiated with the UV light.

### M1 mutant

#### Low $\text{pK}_a$ form

To the protein solution at 1 mg/mL was added four equivalents of retinal. The spectra of the protein-ligand mixture were tracked until complete loss of the PSB was obtained. Then the mixture was concentrated to 20 mg/mL using concentrator cells. A twenty-four well crystallization plate was used for vapor diffusion crystallization with the reservoir solution containing 12% PEG 3350 and 8% Tacsimate at  $\text{pH} = 6.0$ . 1  $\mu\text{L}$  of protein solution was mixed with 1  $\mu\text{L}$  reservoir solution. Crystals appeared and grew after 24 h. These crystals had a light red color indicating the presence of PSB in the crystals. In

order to deprotonate the PSB in the crystals, they were soaked in 12% PEG 3350 and 8% Tacsimate at pH = 7.5 for 45 minutes until crystals became colorless. The soaked crystals were flash frozen in the same solution containing 20% glycerol.

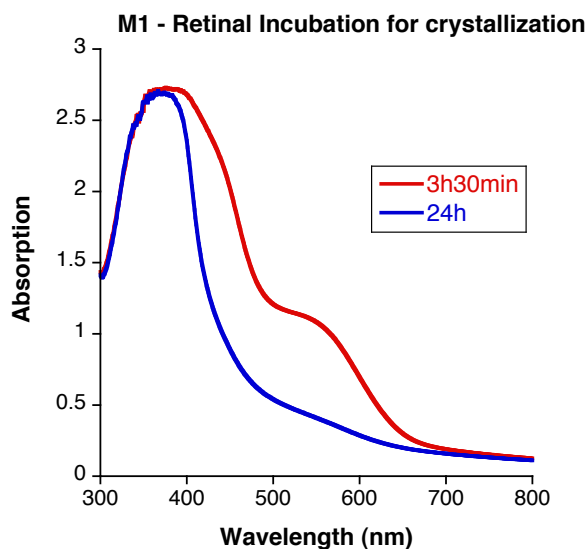

**Figure S8.** M1 mutant PSB loss overtime in the solution used for crystallization.

#### **For UV irradiated PSB product:**

Soaked crystals described in the previous section were UV irradiated with a hand held TLC UV lamp for 1 h in dark. The UV irradiated crystals showed a red color at the end of the irradiation period, and were flash frozen immediately under dim microscope light in 12% PEG 3350, 8% Tacsimate at pH = 7.5 and 20% glycerol.

#### **M10 mutant**

To the concentrated protein solution at 20 mg/mL was added four equivalents of retinal and incubated for three hours. A 24 well crystallization plate was used for vapor diffusion crystallization with the reservoir solution of 1 mL, containing 20% PEG3350 and 0.1 M malonate at pH = 6.0. 1  $\mu$ L of protein solution was mixed with 1  $\mu$ L reservoir solution. Crystals appeared after 24 h and grew in 5 days at 4 °C. Crystals were flash frozen in a solution containing the mother liquor and 20% glycerol.

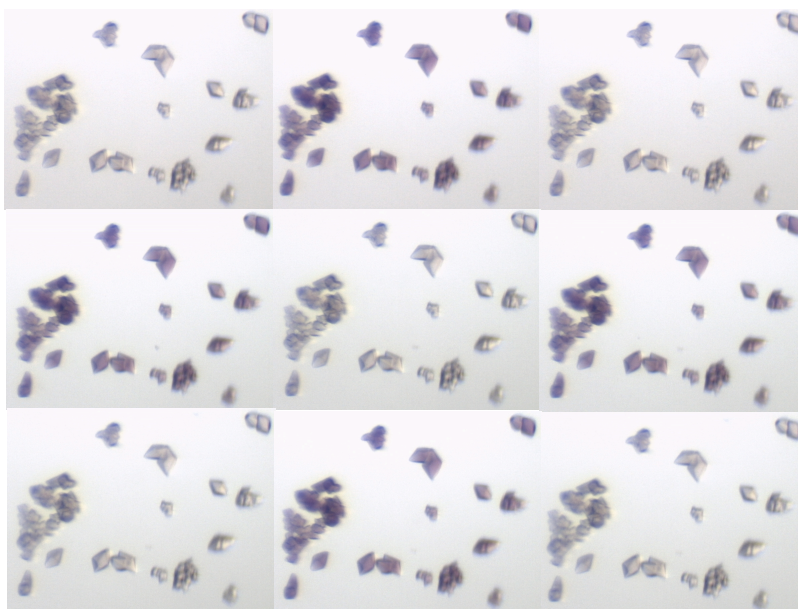

**Figure S9.** M1 crystals during UV light and visible light irradiation after soaking to pH 7.5, as described above. Each cycle is exposed for 10 minutes with UV light and for 10 minutes with Green light to induce the color change.

### **M3 mutant**

To the concentrated protein solution at 20 mg/mL was added four equivalents of retinal and incubated for three hours. A 24 well crystallization plate was used for vapor diffusion crystallization with the reservoir solution of 1 mL, containing 20% PEG3350 and 0.1 M bis Tris Propane at pH = 6.0, 0.2 M sodium fluoride. 1  $\mu$ L of protein solution was mixed with 1  $\mu$ L reservoir solution. Crystals appeared after 24 h and grew in 5 days at 4 °C. Crystals were flash frozen in a solution containing the mother liquor and 20% glycerol.

## **J. DATA COLLECTION AND REFINEMENT**

Diffraction data were collected at the Advanced Photon Source (APS) (Argonne IL) at the LSCAT (sector 21) at 1.00 Å wavelength radiation at 100 K. Data reduction and scaling were performed using the HKL2000 program package <sup>4</sup>. The structures were solved using Molecular Replacement using the CCP4 program <sup>5</sup> suite, and refined using the PHENIX program package <sup>6</sup>. The search model was R132K:R111L:L121E mutant of Cellular Retinoic Acid Binding Protein II (protein data bank code 2G7B). Three cycles of refinement was implemented for each run and placement of ordered water molecules was done in COOT (0.6.1) <sup>7</sup>. The chromophore was manually fitted in the electron density at the end of the refinement.

**Table S2.** X-ray Crystallography Data and Refinement Statistics.

| Protein                                       | M1-SB-cycle1                | M1-UV-cycle1           | M1-SB-cycle2           | M1-UV-cycle2           | M1-SB-cycle3           | M1-UV-cycle3           |
|-----------------------------------------------|-----------------------------|------------------------|------------------------|------------------------|------------------------|------------------------|
| <b>Space group</b>                            | P3 <sub>1</sub> 21          | P3 <sub>1</sub> 21     | P3 <sub>1</sub> 21     | P3 <sub>1</sub> 21     | P3 <sub>1</sub> 21     | P3 <sub>1</sub> 21     |
| <b>a (Å)</b>                                  | 58.6                        | 58.3                   | 58.6                   | 58.5                   | 58.5                   | 58.7                   |
| <b>b (Å)</b>                                  | 58.6                        | 58.3                   | 58.6                   | 58.5                   | 58.5                   | 58.7                   |
| <b>c (Å)</b>                                  | 99.4                        | 99.9                   | 99.9                   | 100.4                  | 99.7                   | 100.4                  |
| <b>α (°)</b>                                  | 90                          | 90                     | 90                     | 90                     | 90                     | 90                     |
| <b>β (°)</b>                                  | 90                          | 90                     | 90                     | 90                     | 90                     | 90                     |
| <b>γ (°)</b>                                  | 120                         | 120                    | 120                    | 120                    | 120                    | 120                    |
| <b>Molecules per Asymmetric Unit</b>          | 1                           | 1                      | 1                      | 1                      | 1                      | 1                      |
| <b>Total reflection</b>                       | 189007                      | 163428                 | 161415                 | 161005                 | 155486                 | 145510                 |
| <b>Unique Reflection</b>                      | 17990                       | 15647                  | 14985                  | 14868                  | 14966                  | 13508                  |
| <b>Completeness (%)</b>                       | 99.6<br>(99.6) <sup>a</sup> | 99.4<br>(85.3)         | 99.5<br>(99.3)         | 100<br>(100)           | 99.4<br>(99)           | 100<br>(99.8)          |
| <b>Average I/σ</b>                            | 36.1<br>(3.78)              | 34.86<br>(3.65)        | 33.94<br>(4.69)        | 39.06<br>(4.38)        | 26.69<br>(2.00)        | 38.81<br>(4.38)        |
| <b>R<sub>merge</sub> (%)</b>                  | 7.1<br>(52.3)               | 8.3<br>(40.5)          | 8.9<br>(44.6)          | 8<br>(54.4)            | 9.8<br>(57.3)          | 6.7<br>(55.7)          |
| <b>Resolution (Å)<br/>(Last Shell)</b>        | 50-1.83<br>(1.86-1.83)      | 50-1.92<br>(1.95-1.92) | 50-1.95<br>(1.98-1.95) | 50-1.96<br>(1.99-1.96) | 50-1.95<br>(1.98-1.95) | 50-2.03<br>(2.07-2.03) |
| <b>R<sub>cryst</sub>/R<sub>free</sub> (%)</b> | 18.57/23.84                 | 19.74/24.45            | 18.99 /23.80           | 20.52/24.93            | 19.16/24.05            | 21.02/25.73            |
| <b>RMSD From Ideal Values</b>                 |                             |                        |                        |                        |                        |                        |
| <b>Bond Length (Å)</b>                        | 0.007                       | 0.008                  | 0.007                  | 0.008                  | 0.008                  | 0.008                  |
| <b>Bond Angle (°)</b>                         | 1.192                       | 1.228                  | 1.106                  | 1.104                  | 1.201                  | 1.152                  |
| <b>Average B factor</b>                       | 26.90                       | 29.8                   | 29.76                  | 34.71                  | 29.99                  | 36.24                  |
| <b>Number of water molecules</b>              | 199                         | 141                    | 161                    | 123                    | 147                    | 106                    |
| <b>PDB IDs</b>                                | 4YBP                        | 4YBU                   | 4YCE                   | 4YCH                   | 4YDA                   | 4YDB                   |

<sup>a</sup> Values in the parenthesis refer to the last resolution shell.

**Table S3.** X-ray Crystallography Data and Refinement Statistics.

| Protein                                       | M2- PSB                     | M2-SB- cycle1          | M2-UV- cycle1          | M2-SB- cycle2          | M2-UV- cycle2          | M2-SB- cycle3          | M2-UV- cycle3          |
|-----------------------------------------------|-----------------------------|------------------------|------------------------|------------------------|------------------------|------------------------|------------------------|
| <b>Space group</b>                            | P3 <sub>1</sub> 21          | P3 <sub>1</sub> 21     | P3 <sub>1</sub> 21     | P3 <sub>1</sub> 21     | P3 <sub>1</sub> 21     | P3 <sub>1</sub> 21     | P3 <sub>1</sub> 21     |
| <b>a (Å)</b>                                  | 58.9                        | 58.9                   | 58.9                   | 59.2                   | 58.779                 | 59.0                   | 59.0                   |
| <b>b (Å)</b>                                  | 58.9                        | 58.9                   | 58.9                   | 59.2                   | 58.779                 | 59.0                   | 59.0                   |
| <b>c (Å)</b>                                  | 99.95                       | 99.7                   | 100.4                  | 100.0                  | 101.2                  | 100.4                  | 101.1                  |
| <b>α (°)</b>                                  | 90                          | 90                     | 90                     | 90                     | 90                     | 90                     | 90                     |
| <b>β (°)</b>                                  | 90                          | 90                     | 90                     | 90                     | 90                     | 90                     | 90                     |
| <b>γ (°)</b>                                  | 120                         | 120                    | 120                    | 120                    | 120                    | 120                    | 120                    |
| <b>Molecules per Asymmetric Unit</b>          | 1                           | 1                      | 1                      | 1                      | 1                      | 1                      | 1                      |
| <b>Total reflection</b>                       | 164293                      | 281303                 | 163969                 | 179720                 | 132920                 | 140437                 | 126296                 |
| <b>Unique Reflection</b>                      | 15102                       | 25940                  | 15237                  | 16619                  | 12329                  | 13048                  | 11730                  |
| <b>Completeness (%)</b>                       | 99.5<br>(99.4) <sup>a</sup> | 99.4<br>(98.8)         | 99.6<br>(99.6)         | 99.8<br>(99.2)         | 99.8<br>(99.3)         | 99.9<br>(99.8)         | 100<br>(99.9)          |
| <b>Average I/σ</b>                            | 34.6<br>(3.0)               | 62<br>(4.44)           | 49.5<br>(4.41)         | 48.04<br>(4.53)        | 41.94<br>(4.62)        | 40.72<br>(5.12)        | 38.92<br>(4.1)         |
| <b>R<sub>merge</sub> (%)</b>                  | 9.4<br>(63.9)               | 4.7<br>(47.9)          | 6<br>(52.6)            | 5.9<br>(53)            | 6.5<br>(51.6)          | 6.8<br>(53.3)          | 7.5<br>(54.2)          |
| <b>Resolution (Å)<br/>(Last Shell)</b>        | 50-1.95<br>(1.98-1.95)      | 50-1.62<br>(1.65-1.62) | 50-1.95<br>(1.98-1.95) | 50-1.90<br>(1.93-1.90) | 50-2.10<br>(2.14-2.10) | 50-2.06<br>(2.10-2.06) | 50-2.14<br>(2.18-2.14) |
| <b>R<sub>cryst</sub>/R<sub>free</sub> (%)</b> | 19.34/24.07                 | 19.14/22.52            | 20.01 /26.53           | 20.43/23.81            | 20.38/23.65            | 20.16/25.45            | 19.87/23.46            |
| <b>RMSD From Ideal Values</b>                 |                             |                        |                        |                        |                        |                        |                        |
| <b>Bond Length (Å)</b>                        | 0.007                       | 0.006                  | 0.007                  | 0.007                  | 0.007                  | 0.009                  | 0.009                  |
| <b>Bond Angle (°)</b>                         | 1.239                       | 1.167                  | 1.144                  | 1.123                  | 1.097                  | 1.228                  | 1.167                  |
| <b>Average B factor</b>                       | 34.85                       | 29.04                  | 35.97                  | 32.94                  | 39.96                  | 36.02                  | 40.63                  |
| <b>Number of water molecules</b>              | 110                         | 210                    | 116                    | 135                    | 90                     | 123                    | 92                     |
| <b>PDB IDs</b>                                | 4YFP                        | 4YFQ                   | 4YFR                   | 4YGG                   | 4YGH                   | 4YGZ                   | 4YH0                   |

<sup>a</sup> Values in the parenthesis refer to the last resolution shell.



**Table S4.** X-ray Crystallography Data and Refinement Statistics.

| <b>Protein</b>                                | <b>M3</b>              | <b>M11</b>             |
|-----------------------------------------------|------------------------|------------------------|
| <b>Space group</b>                            | P1                     | P1                     |
| <b>a (Å)</b>                                  | 36.574                 | 36.737                 |
| <b>b (Å)</b>                                  | 39.54                  | 39.21                  |
| <b>c (Å)</b>                                  | 58.183                 | 58.402                 |
| <b>α (°)</b>                                  | 87.078                 | 86.775                 |
| <b>β (°)</b>                                  | 80.016                 | 79.881                 |
| <b>γ (°)</b>                                  | 70.511                 | 70.831                 |
| <b>Molecules per Asymmetric Unit</b>          | 2                      | 2                      |
| <b>Total reflection</b>                       | 156111                 | 135505                 |
| <b>Unique Reflection</b>                      | 41716                  | 42116                  |
| <b>Completeness (%)</b>                       | 95.9<br>(88.4)         | 93.3<br>(70.2)         |
| <b>Average I/σ</b>                            | 31.21<br>(2.60)        | 31<br>(2.55)           |
| <b>R<sub>merge</sub> (%)</b>                  | 6.4<br>(46.1)          | 6.9<br>(28.8)          |
| <b>Resolution (Å)<br/>(Last Shell)</b>        | 50-1.58<br>(1.61-1.58) | 50-1.57<br>(1.60-1.57) |
| <b>R<sub>cryst</sub>/R<sub>free</sub> (%)</b> | 18.17/21.62            | 19.63 /22.53           |
| <b>Bond Length (Å)</b>                        | 0.007                  | 0.006                  |
| <b>Bond Angle (°)</b>                         | 1.120                  | 1.118                  |
| <b>Average B factor</b>                       | 21.26                  | 25.56                  |
| <b>Number of water molecules</b>              | 376                    | 299                    |
| <b>PDB IDs</b>                                | 4YKM                   | 4YKO                   |

<sup>a</sup> Values in the parenthesis refer to the last resolution shell.

## K. THE STRUCTURAL REPRODUCIBILITY OF M2 PHOTOCYCLING

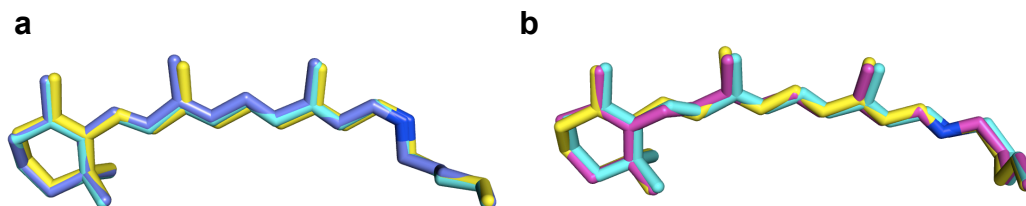

**Figure S10.** Cycling of the **M2** mutant crystals: a. Overlay of the retinal for the first three cycles of UV light irradiated crystals of the **M2** mutant for 30 minutes; b. Overlay of the retinal for the first three cycles of visible light irradiated crystals of the **M2** mutant for 30 minutes.

## L. REFERENCES

- (1) Vasileiou, C.; Vaezeslami, S.; Crist, R. M.; Rabago-Smith, M.; Geiger, J. H.; Borhan, B. *J. Am. Chem. Soc.* **2007**, *129*, 6140.
- (2) Gill, S. C.; Vonhippel, P. H. *Anal. Biochem.* **1989**, *182*, 319.
- (3) Marti, T.; Rosselet, S. J.; Otto, H.; Heyn, M. P.; Khorana, H. G. *J. Biol. Chem.* **1991**, *266*, 18674.
- (4) Otwinowski, Z.; Minor, W. *Macromol. Crystallogr. A* **1997**, *276*, 307.
- (5) Winn, M. D.; Ballard, C. C.; Cowtan, K. D.; Dodson, E. J.; Emsley, P.; Evans, P. R.; Keegan, R. M.; Krissinel, E. B.; Leslie, A. G. W.; McCoy, A.; McNicholas, S. J.; Murshudov, G. N.; Pannu, N. S.; Potterton, E. A.; Powell, H. R.; Read, R. J.; Vagin, A.; Wilson, K. S. *Acta Crystallogr. Sect. D. Biol. Crystallogr.* **2011**, *67*, 235.
- (6) Adams, P. D.; Afonine, P. V.; Bunkoczi, G.; Chen, V. B.; Davis, I. W.; Echols, N.; Headd, J. J.; Hung, L. W.; Kapral, G. J.; Grosse-Kunstleve, R. W.; McCoy, A. J.; Moriarty, N. W.; Oeffner, R.; Read, R. J.; Richardson, D. C.; Richardson, J. S.; Terwilliger, T. C.; Zwart, P. H. *Acta Crystallogr. Sect. D. Biol. Crystallogr.* **2010**, *66*, 213.
- (7) Emsley, P.; Lohkamp, B.; Scott, W. G.; Cowtan, K. *Acta Crystallogr. Sect. D. Biol. Crystallogr.* **2010**, *66*, 486.
